# Supplementary material for: Heliorhodopsin binds and regulates glutamine synthetase activity
Source: PubMed Central journal article supplement (PMC9529153; doi:10.1371/journal.pbio.3001817), 2022-10-03

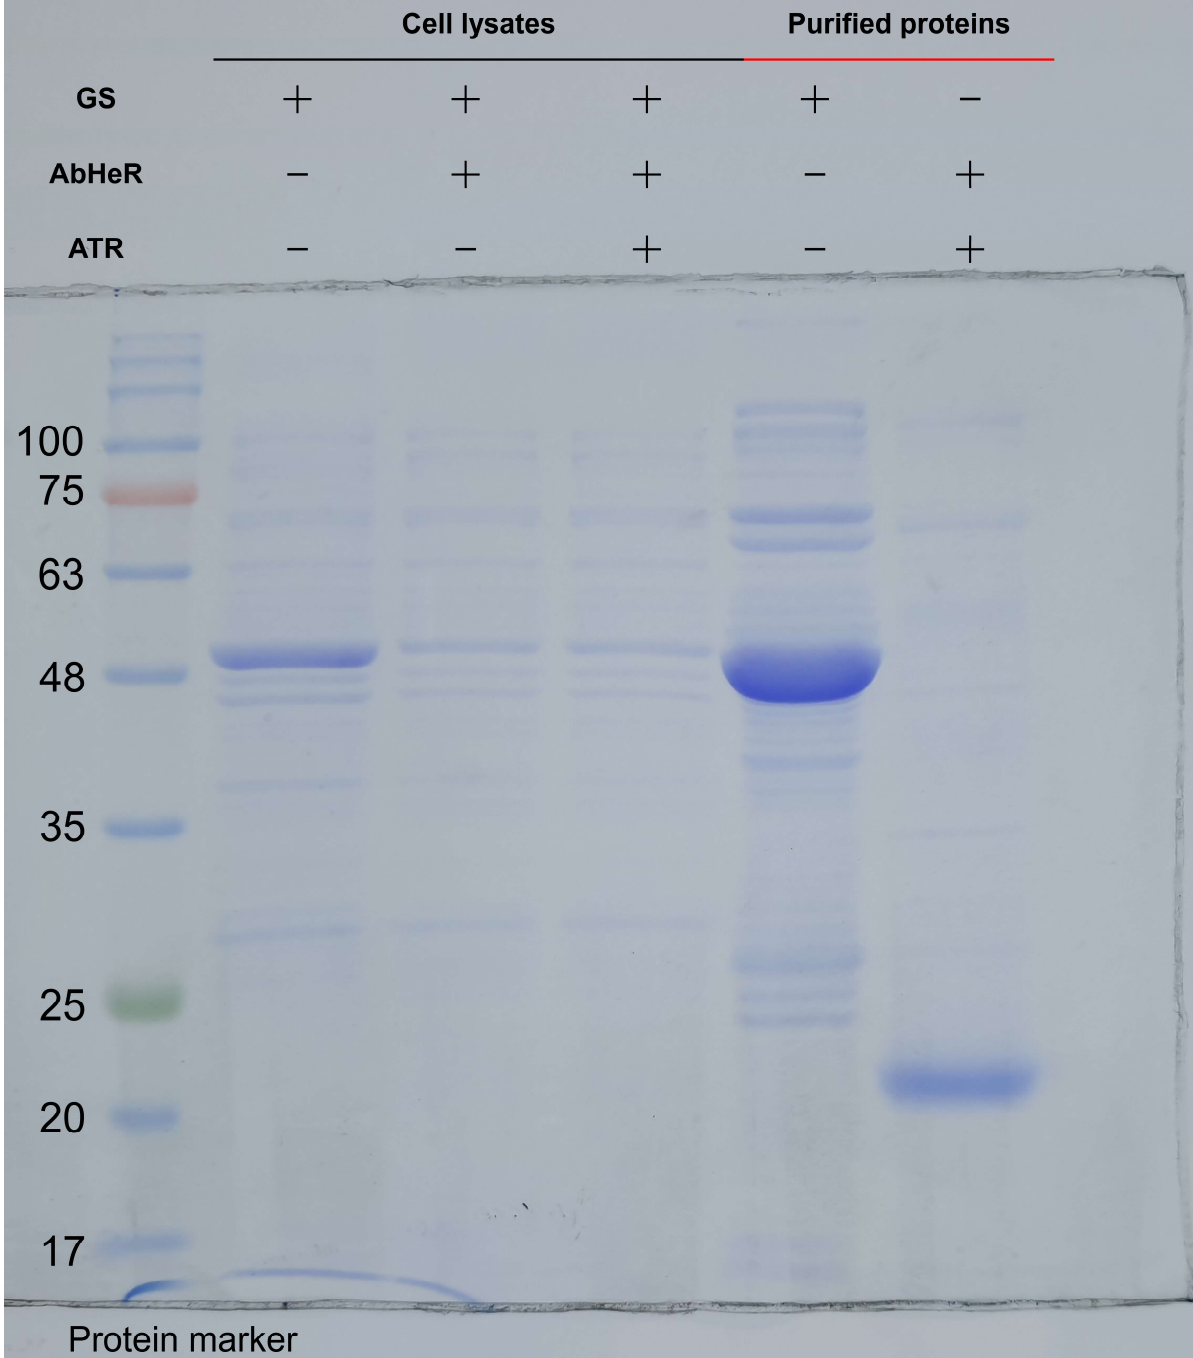

Protein marker

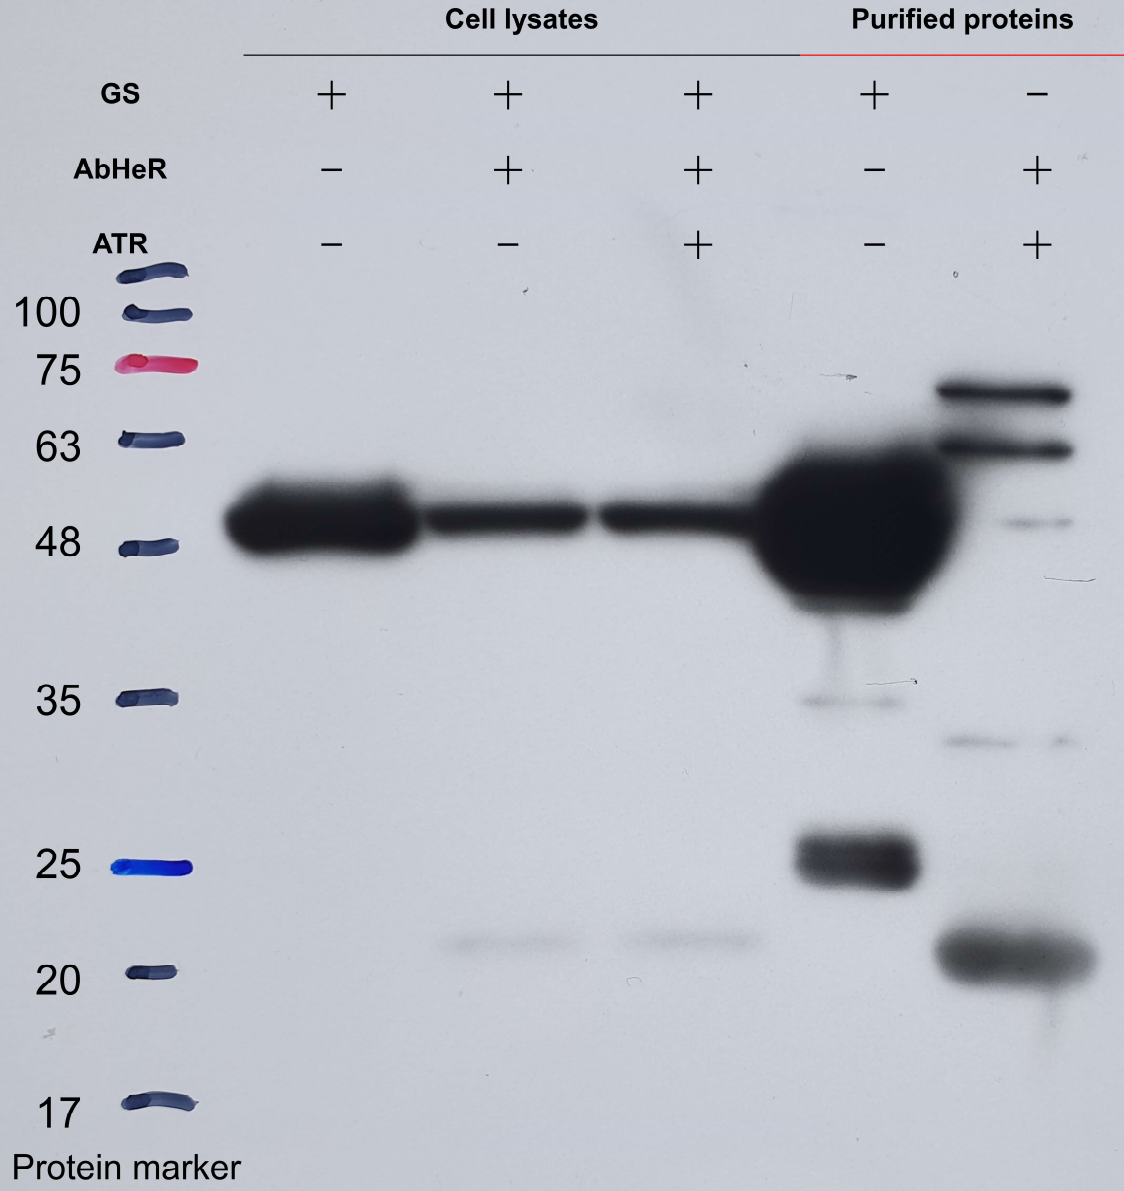

Supplement: pbio.3001817.s009.pdf [file pbio.3001817.s009.pdf]
